# Supplementary material for: Fine tuning of pore size in metal–organic frameworks for superior removal of U(vi) from aqueous solution
Source: Royal Society of Chemistry journal article supplement (doi:10.1039/d4nj00368c), 2024-01-01
Supplement: d4nj00368c1.pdf [file d4nj00368c1.pdf]

## Supporting Information

### **Fine tuning of pore size in metal-organic frameworks for superior removal of U(VI) from aqueous solution**

Tianyu Fu<sup>a</sup>, Hongjuan Liu<sup>a,c\*</sup>, Xinyi Wang<sup>a</sup> and Yingjiu Liu<sup>b</sup>

<sup>a</sup>*School of Nuclear Science and Technology, University of South China, Hengyang, 421001, China*

<sup>b</sup>*Hunan Province Key Laboratory of Pollution Control and Resources Reuse Technology, University of South China, Hengyang 421001, PR China*

<sup>c</sup>*Key Discipline Laboratory for National Defense for Biotechnology in Uranium Mining and Hydrometallurgy, University of South China, Hengyang 421001, PR China*

\*To whom correspondence should be addressed. Electronic mail: [l\\_ruyue@126.com](mailto:l_ruyue@126.com) (Hongjuan Liu).

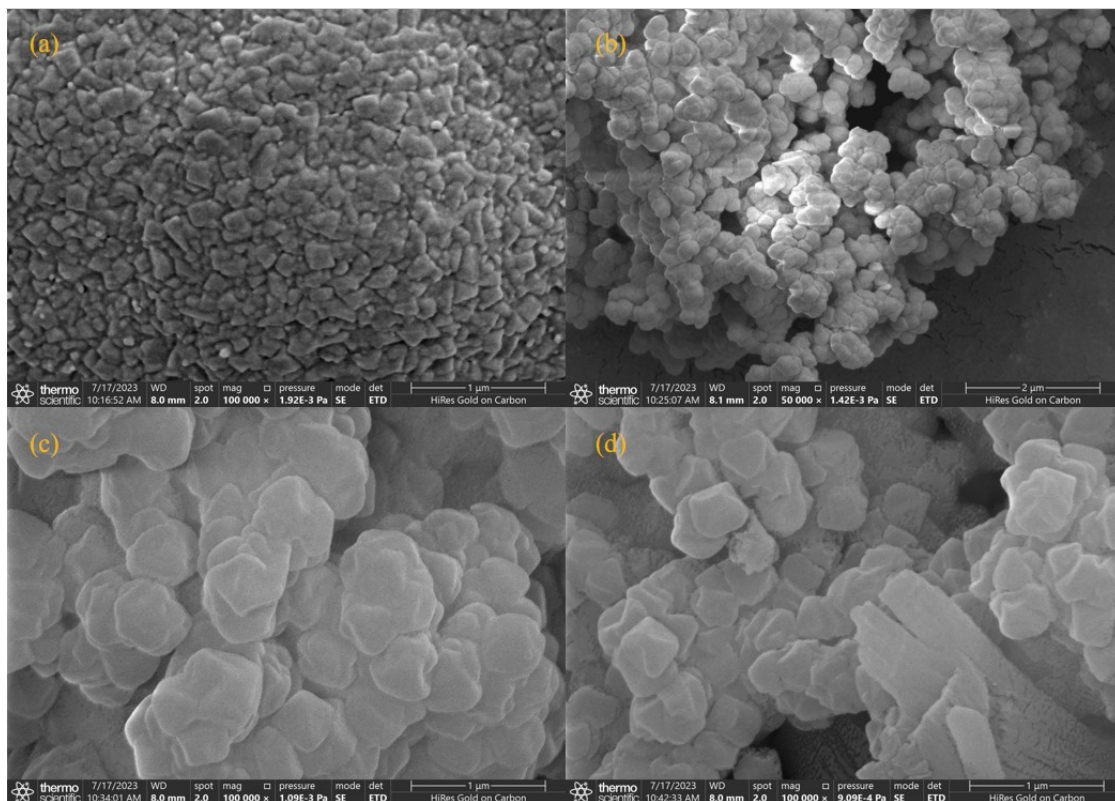

**Fig. S1.** SEM images of (a) MOF-A, (b) MOF-B, (c) MOF-C, (d) MOF-C with U.

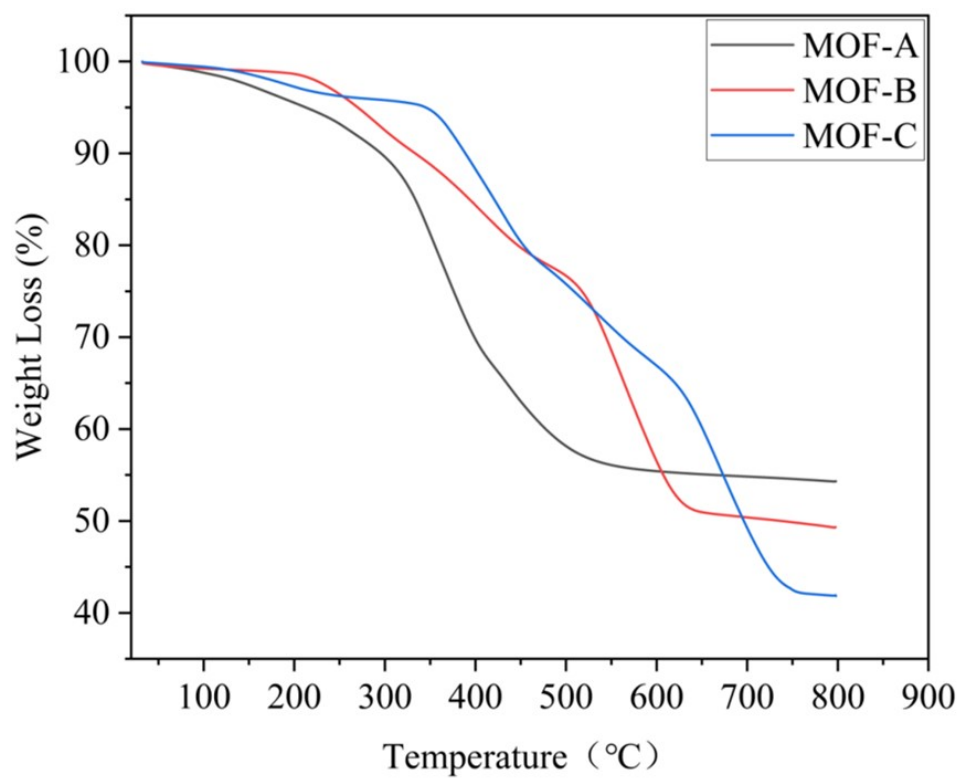

**Fig. S2.** The thermogravimetric curves of three MOFs.

**Table S1** Kinetic parameters for the U(VI) adsorption of MOFs

| Adsorbents | Pseudo-first-order kinetics        |                        |       | Pseudo-second-order kinetics |                        |       |
|------------|------------------------------------|------------------------|-------|------------------------------|------------------------|-------|
|            | $Q_e(\text{mg}\cdot\text{g}^{-1})$ | $K_1(\text{min}^{-1})$ | $R^2$ | $Q_e(\text{mg}/\text{g})$    | $K_2(\text{min}^{-1})$ | $R^2$ |
| MOF-A      | 18.08                              | 0.0777                 | 0.968 | 39.34                        | 0.0034                 | 0.998 |
| MOF-B      | 6.34                               | 0.0792                 | 0.691 | 42.30                        | 0.0087                 | 0.999 |
| MOF-C      | 22.18                              | 0.1579                 | 0.882 | 43.29                        | 0.0090                 | 0.999 |

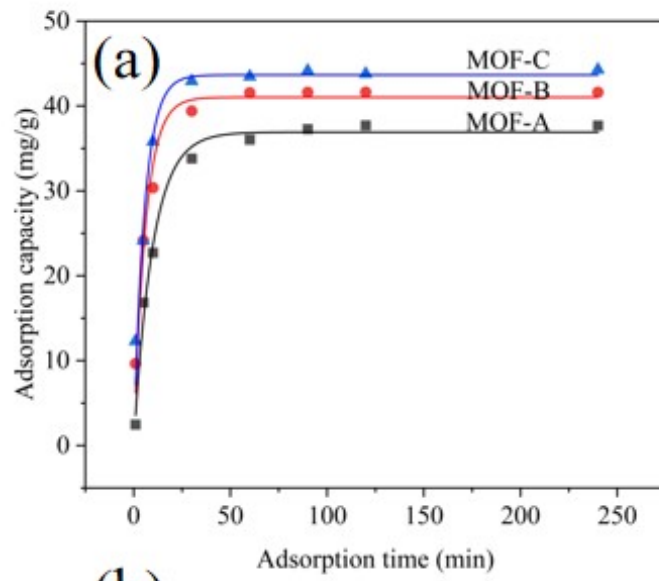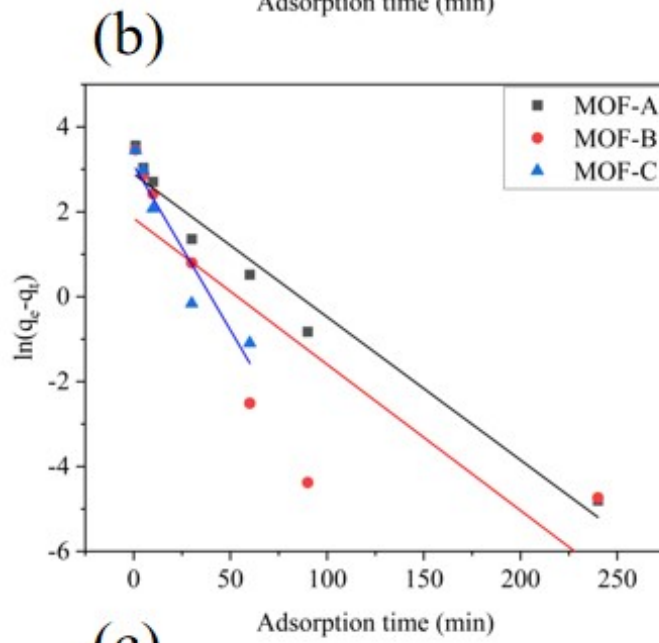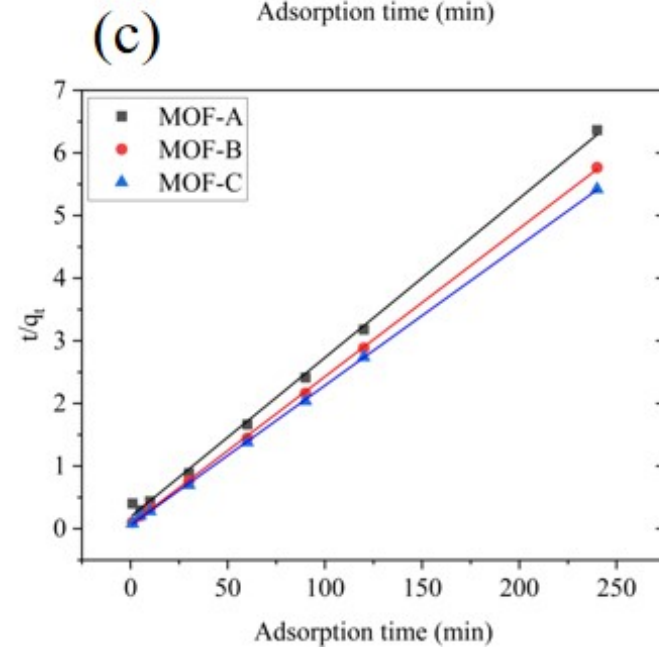

**Fig. S3.** (a) Effect of contact time on the U(VI) adsorption by MOF-A, MOF-B, and MOF-C (m=10 mg, pH=11 (MOF-A), pH=5 (MOF-B and MOF-C), T=308 K,  $C_0=20$  mg·L<sup>-1</sup>); (b) Pseudo-first-order kinetics fitting and (c) pseudo-first-order kinetics fitting for the three MOFs.

**Table S2** Parameters of Langmuir and Freundlich isotherm models of the U(VI) adsorption on three MOFs

| Adsorbents | Langmuir model                     |                                    |       | Freundlich model                   |         |       |
|------------|------------------------------------|------------------------------------|-------|------------------------------------|---------|-------|
|            | $Q_m(\text{mg}\cdot\text{g}^{-1})$ | $K_l(\text{L}\cdot\text{mg}^{-1})$ | $R^2$ | $K_f(\text{L}\cdot\text{mg}^{-1})$ | $1/n$   | $R^2$ |
| MOF-A      | 51.91                              | 0.12576                            | 0.993 | 14.14                              | 0.27717 | 0.943 |
| MOF-B      | 550.03                             | 0.04212                            | 0.993 | 60.04                              | 0.44265 | 0.942 |
| MOF-C      | 584.13                             | 0.04679                            | 0.995 | 65.67                              | 0.44778 | 0.931 |

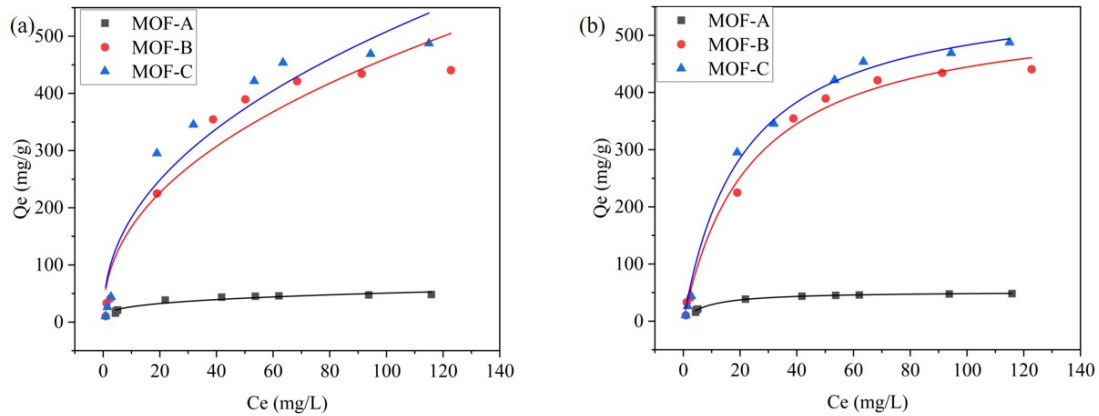

**Fig. S4.** Adsorption isotherms of U(VI) on MOF-A, MOF-B and MOF-C (adsorbent amount: 10 mg; pH: 11 (MOF-A), 5 (MOF-B and MOF-C); temperature: 308 K; contact time: 90 min); (a) Freundlich model fitting; (b) Langmuir model fitting.

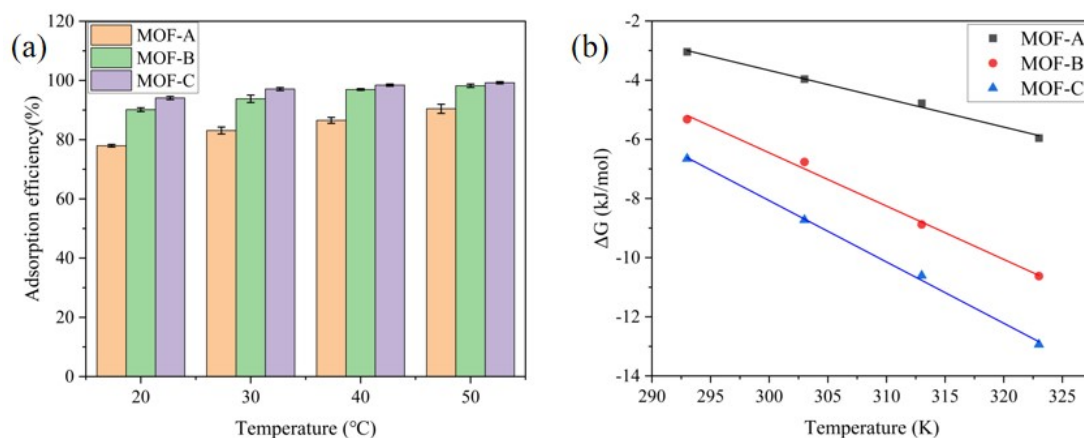

**Fig. S5.** (a) Effect of temperature on the U (VI) adsorption performance of MOF-A, MOF-B and MOF-C (adsorbent amount: 10 mg; pH: 11 (MOF-A), 5 (MOF-B and MOF-C); initial U (VI) concentration: 20 mg·L<sup>-1</sup>; contact time: 90 min); (b)

Thermodynamic fitting of three MOFs.

**Table S3** Thermodynamic parameters of uranium adsorption by MOFs

| Adsorbents | $\Delta G$ (kJ/mol) |       |        |        | $\Delta H$ (kJ/mol) | $\Delta S$ (kJ/mol) | $R^2$ |
|------------|---------------------|-------|--------|--------|---------------------|---------------------|-------|
|            | 293 K               | 303 K | 313 K  | 323 K  |                     |                     |       |
| MOF-A      | -3.04               | -3.96 | -4.78  | -5.96  | 25.04               | 0.095               | 0.994 |
| MOF-B      | -5.32               | -6.76 | -8.88  | -10.62 | 47.60               | 0.18                | 0.995 |
| MOF-C      | -6.65               | -8.72 | -10.61 | -12.94 | 54.12               | 0.21                | 0.998 |
